# Supplementary material for: Graphene oxide-based silsesquioxane-crosslinked networks – synthesis and rheological behavior
Source: Royal Society of Chemistry journal article supplement (doi:10.1039/c7ra02764h), 2017-01-01
Supplement: c7ra02764h1.pdf [file c7ra02764h1.pdf]

# Graphene oxide-based silsesquioxane-crosslinked networks – synthesis and rheological behavior

Mina Namvari<sup>1,2</sup>, Lei Du<sup>1,2</sup>, Florian J. Stadler<sup>1\*</sup>

<sup>1</sup>College of Materials Science and Engineering, Shenzhen Key Laboratory of Polymer Science and Technology, Guangdong Research Center for Interfacial Engineering of Functional Materials, Nanshan District Key Lab for Biopolymers and Safety Evaluation, Shenzhen University, Shenzhen 518060, PR China

<sup>2</sup>Key Laboratory of Optoelectronic Devices and System of Ministry of Education and Guangdong Province, College of Optoelectronic Engineering, Shenzhen University, Shenzhen, People's Republic of China

\* Prof. Florian J. Stadler

+86-0755-26538236

fjstadler@szu.edu.cn

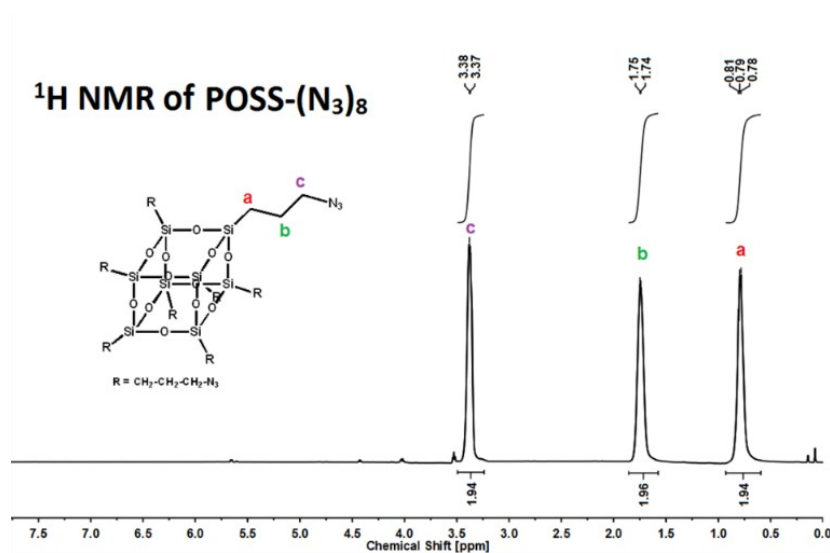

Fig. SI1. <sup>1</sup>H NMR of POSS-(N<sub>3</sub>)<sub>8</sub>.

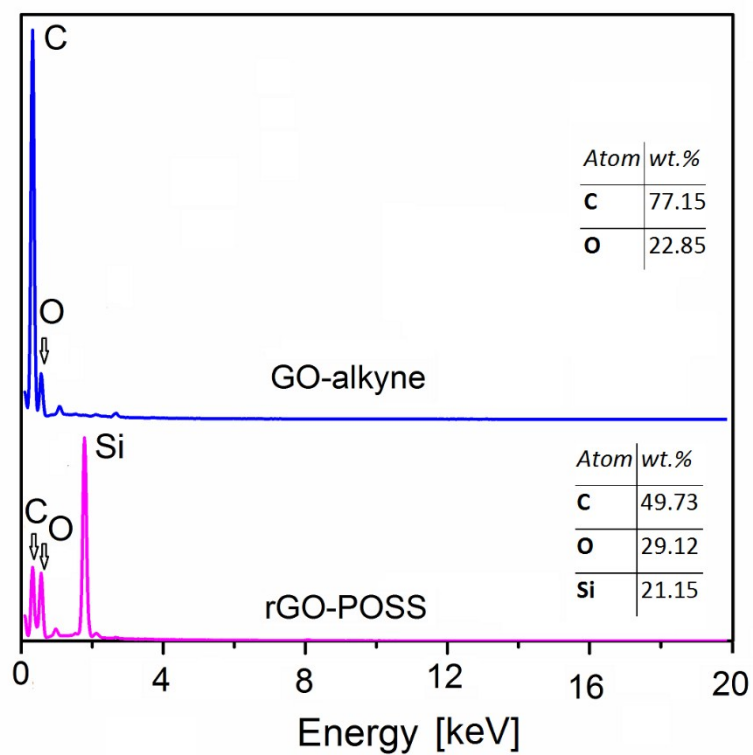

Fig. SI2. EDX of GO-alkyne and rGO-POSS.

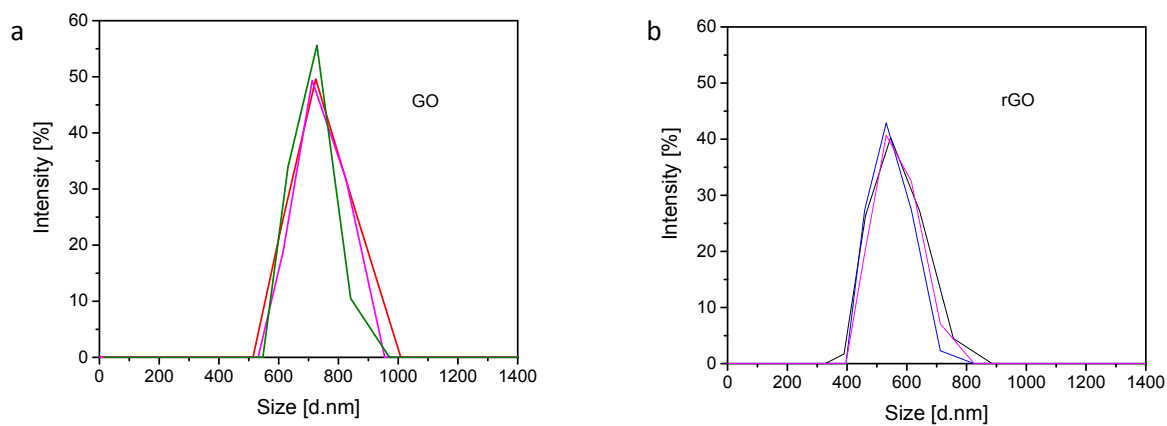

Fig. SI3. Size distribution of GO (a) and rGO (b) in THF ( $0.5 \text{ mg mL}^{-1}$ ).
